# Supplementary material for: Clinical Indicators for Surgical Management about Adult Intussusceptions
Source: Research Square preprint supplement (doi:10.21203/rs.3.rs-7754673/v1), 2025-11-04
Supplement: Supplementary file 1 [file 745e861cf223dbe649d5ac84.docx]

| Variable | Malignant (n=10) | Benign (n=9) | p-value |
| --- | --- | --- | --- |
| Age (years) | 53.3 ± 12.2 | 43.7 ± 16.5 | 0.1637 |
| Bowel diameter (mm) | 51.3 ± 11.6 | 46.1 ± 8.5 | 0.2858 |
| Length of resection (cm) | 28.8 ± 27.1 | 20.4 ± 10.5 | 0.3988 |
| İntususseption type |  | | |
| – Colon | 7(70%) | 3(30%) | 0.023* |
| – Small bowel | 3(33.3%) | 6(66.6%) |  |

Note: Continuous variables are presented as mean ± standard deviation (minimum–maximum); categorical variables are presented as counts and percentages.
