# Supplementary material for: Clinical Indicators for Surgical Management about Adult Intussusceptions
Source: Research Square preprint supplement (doi:10.21203/rs.3.rs-7754673/v1), 2025-11-04
Supplement: Supplementary file 2 [file 80477aa4cdb575ef148bb0a4.docx]

| Characteristic | Value |
| --- | --- |
| Total number of patients | 40 |
| Gender |  |
| – Female | 20 (50.0%) |
| – Male | 20 (50.0%) |
| Age (years) | 43.9 ± 16.5 (range: 18–75) |
| Presence of symptoms |  |
| – Yes | 27 (67.5%) |
| – No | 13 (32.5%) |
| Diagnostic modality |  |
| – Computed Tomography (CT) | 36 (90.0%) |
| – Magnetic Resonance Imaging (MRI) | 4 (10.0%) |
| Type of intussusception |  |
| – Ileo-ileal | 23 (57.5%) |
| – Colo-colic | 11 (27.5%) |
| – Jejuno-jejunal | 3 (7.5%) |
| – Ileo-colic | 3 (7.5%) |
| Presence of ileus |  |
| – Yes | 13 (32.5%) |
| – No | 27 (67.5%) |
| Bowel diameter (mm) | 41.8 ± 13.0 (range: 20–70) |

Note: Continuous variables are presented as mean ± standard deviation (minimum–maximum); categorical variables are presented as counts and percentages.
