# Supplementary material for: Clinical Indicators for Surgical Management about Adult Intussusceptions
Source: Research Square preprint supplement (doi:10.21203/rs.3.rs-7754673/v1), 2025-11-04
Supplement: Supplementary file 3 [file d3f1e0a7133c5862c844975e.docx]

| Variable | Operated (n = 19) | Non-operated (n = 21) | p-value |
| --- | --- | --- | --- |
| Age (years), mean ± SD | 48.7 ± 14.8 | 39.4 ± 16.9 | 0.056 |
| Gender (Male/Female) | 10/9 | 10/11 | 0.752 |
| Symptomatic at admission | 16(84.2%) | 11(52.3%) | 0.032* |
| Presence of ileus | 11 (57.9%) | 2 (9.5%) | 0.0246* |
| Bowel diameter (mm), mean ± SD | 49.3 ± 10.3 | 35.4 ± 12 | 0.005* |
| Type of intussusception |  |  | 0.0854 |
| – Ileo-ileal | 9 | 14 |  |
| – Colonic | 8 | 3 |  |
| – Ileo-colic | 2 | 1 |  |
| – Jejuno-jejunal | 0 | 3 |  |

Note: Continuous variables are presented as mean ± standard deviation (minimum–maximum); categorical variables are presented as counts and percentages.
