# Supplementary material for: Clinical Indicators for Surgical Management about Adult Intussusceptions
Source: Research Square preprint supplement (doi:10.21203/rs.3.rs-7754673/v1), 2025-11-04
Supplement: Supplementary file 4 [file d73bab1c93d1a6208e4bb9bd.docx]

| Characteristic | Value |
| --- | --- |
| Type of surgery |  |
| – Partial small bowel resection | 9 (47.4%) |
| – Partial colon resection | 10 (52.6%) |
| Resection length (cm) | 24.8 ± 20.9 (range: 5–70) |
| Hospital stay (days) | 6.9 ± 3.4 (range: 2–14) |
| Pathological diagnosis |  |
| – Benign | 9 (47.4%) |
| – Malignant | 10 (52.6%) |
| Postoperative complications |  |
| – Yes | 1 (5.3%) |
| – No | 18 (94.7%) |

Note: Continuous variables are presented as mean ± standard deviation (minimum–maximum); categorical variables are presented as counts and percentages.
