# Supplementary material for: Clinical Indicators for Surgical Management about Adult Intussusceptions
Source: Research Square preprint supplement (doi:10.21203/rs.3.rs-7754673/v1), 2025-11-04
Supplement: Supplementary file 5 [file ea7c08331cdd0cc746446918.docx]

Table Legends

Table 1: Descriptive clinical characteristics of the patients

Table 2: Clinical characteristics of surgically treated patients (n = 19)

Table 3: Comparison of clinical and radiological parameters between operated and non-operated patients

Table 4: Statistical evaluation according to pathological results
